# Supplementary material for: pH-stabilized polydiacetylenes achieved through sodium dodecyl benzenesulfonate doping: application in dopamine sensing
Source: Royal Society of Chemistry journal article supplement (doi:10.1039/d5qm00710k), 2025-11-26
Supplement: d5qm00710k1.pdf [file d5qm00710k1.pdf]

## Supporting Information

### pH-Stabilized Polydiacetylenes through Sodium Dodecyl Benzenesulfonate Doping: Its Application in Dopamine Sensing

Ankit Thakuri, Mainak Banerjee\*, and Amrita Chatterjee\*

<sup>a</sup>Department of Chemistry, Birla Institute of Technology and Science Pilani, K K Birla Goa Campus, NH 17B, Bypass Road, Zuarinagar, Sancoale, Goa-403726, INDIA.

\*Email id: [amrita@goa.bits-pilani.ac.in](mailto:amrita@goa.bits-pilani.ac.in), [mainak@goa.bits-pilani.ac.in](mailto:mainak@goa.bits-pilani.ac.in)

#### Table of contents

| Sr. No. | Title                                                                                           | Page No. |
|---------|-------------------------------------------------------------------------------------------------|----------|
| 1.      | The colorimetric response of PCDA:surfactant towards NaOH (Figures S1, S2, and S3)              | S2-S3    |
| 2.      | The UV-Vis response of <b>PCDA:SDBS</b> towards NaOH (Figure S4)                                | S3       |
| 3.      | pH responsiveness study (Figure S5 and S6)                                                      | S4       |
| 4.      | Zeta potential studies (Figure S7)                                                              | S5       |
| 5.      | Buffer study of <b>PCDA:SDBS</b> (Figure S8)                                                    | S5       |
| 6.      | Response of <b>PCDA:SDBS</b> towards common cations, anions and biogenic polyamines (Figure S9) | S6       |
| 7.      | Thermal stability study (Figure S10)                                                            | S7       |
| 8.      | The response of <b>PCDA:SDBS</b> (3:5) upon the addition of CTAB (Figures S11)                  | S7       |
| 9.      | The UV-Vis response of PCDA:surfactant solution towards CTAB (Figures S12, S13, and S13)        | S8-S9    |

## 1. The colorimetric response of PCDA:surfactant towards NaOH

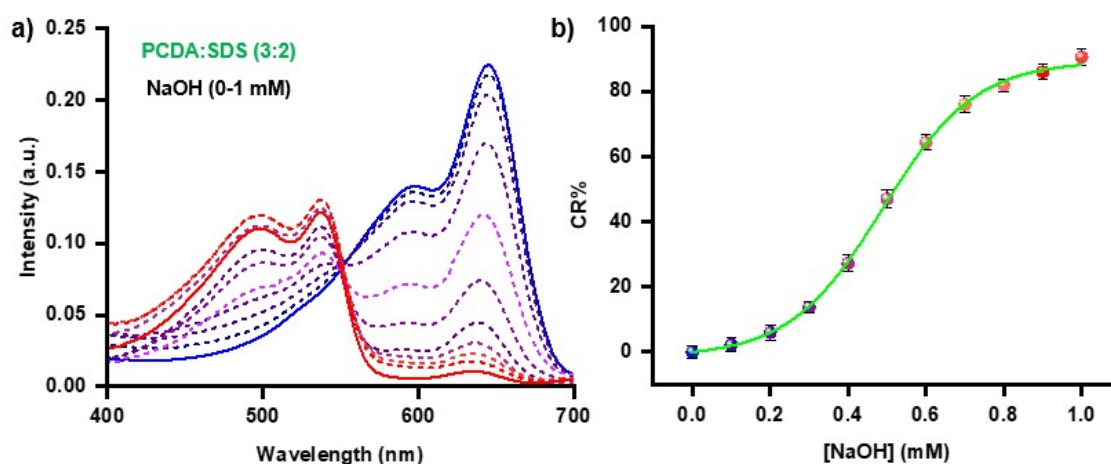

Figure S1. The changes in the UV-Vis a) absorbance band and b) corresponding colorimetric response of PCDA:SDS (3:2).

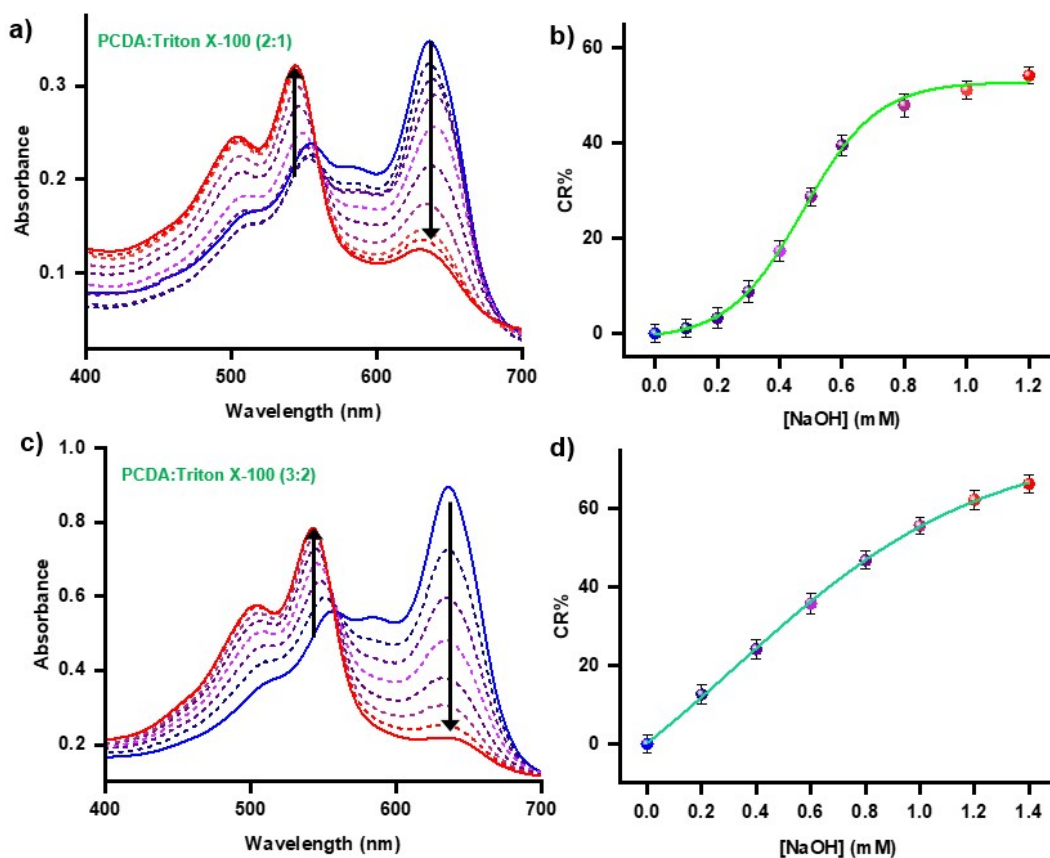

Figure S2. The a) and c) UV-Vis response and b) and d) corresponding colorimetric response of PCDA:Triton X-100 (2:1 and 3:2, respectively).

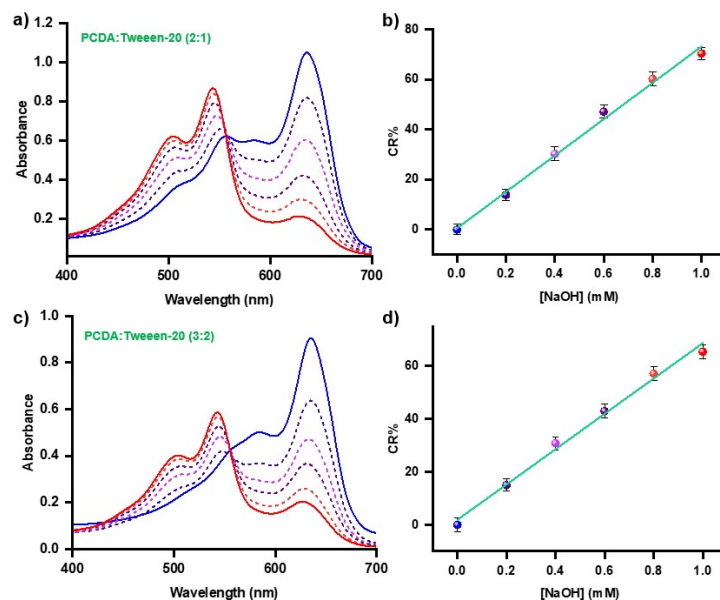

Figure S3. The a) and c) UV-Vis response and b) and d) corresponding colorimetric response of PCDA:Tween-20 (2:1 and 3:2, respectively).

## 2. The UV-Vis response of PCDA:SDBS towards NaOH

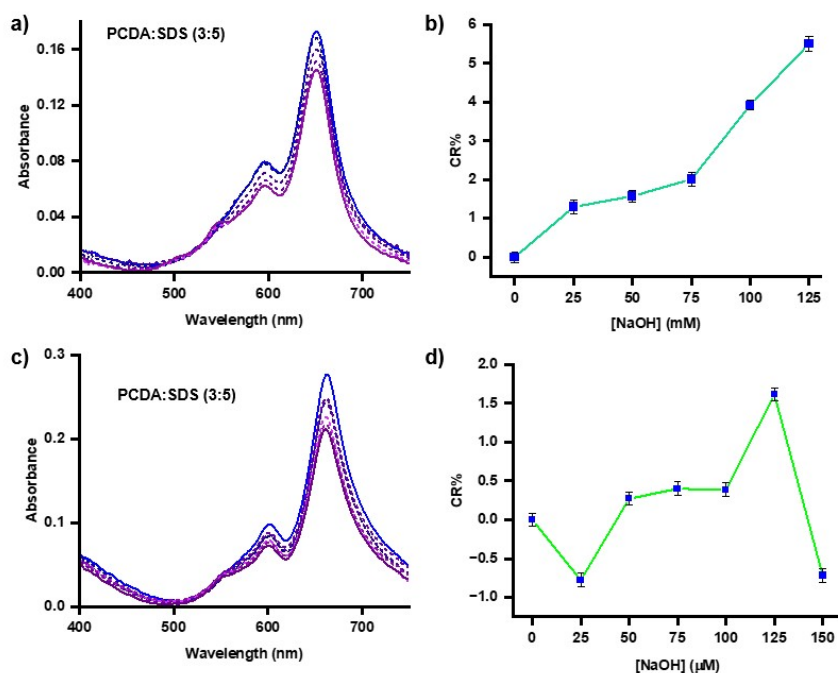

Figure S4. The a) and c) UV-Vis response and b) and d) corresponding colorimetric response of PCDA:SDBS (3:2 and 3:5, respectively) displaying enhanced stability against NaOH addition, a well-known stimulant of polydiacetylenes.

### 3. pH responsiveness study

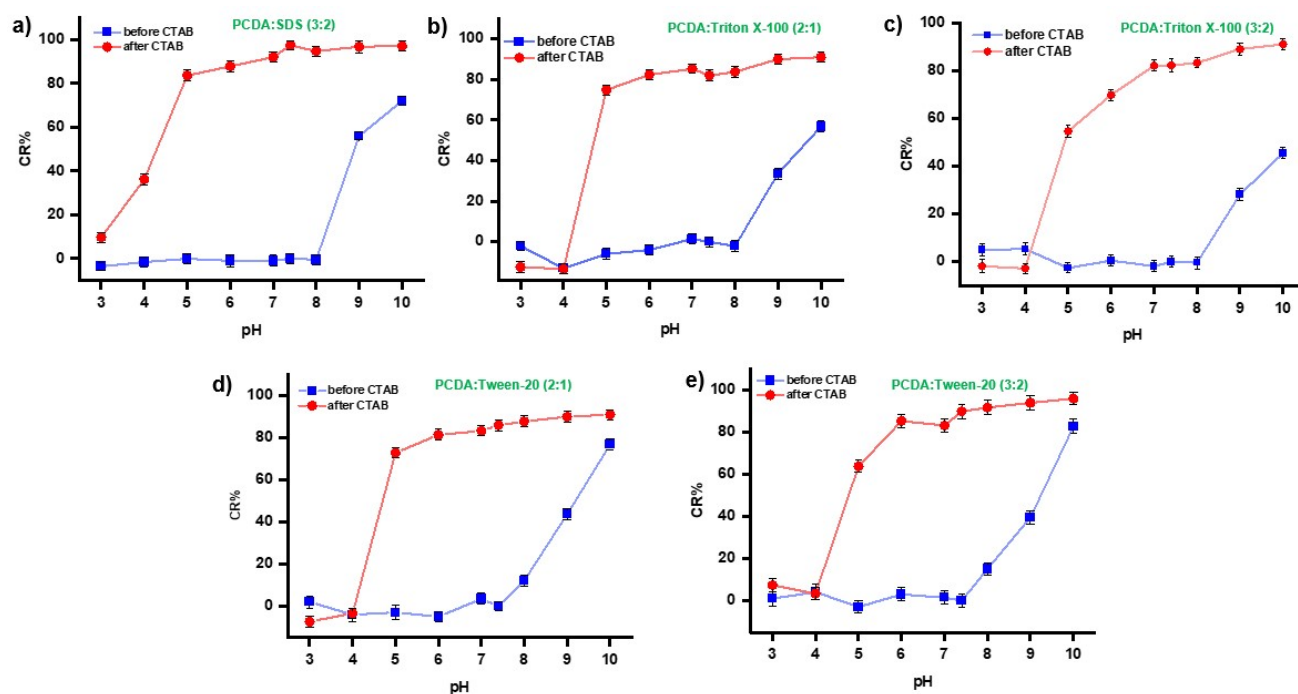

Figure S5. The colorimetric response of a) PCDA:SDS (3:2), b) PCDA:Triton X-100 (2:1), c) PCDA:Triton X-100 (3:2), d) PCDA:Tween-20 (2:1), and e) PCDA:Tween-20 (3:2) towards CTAB in varying pH. The results are in agreement with previous reports, where polydiacetylenes display chromatic change in basic pH without any other stimulus

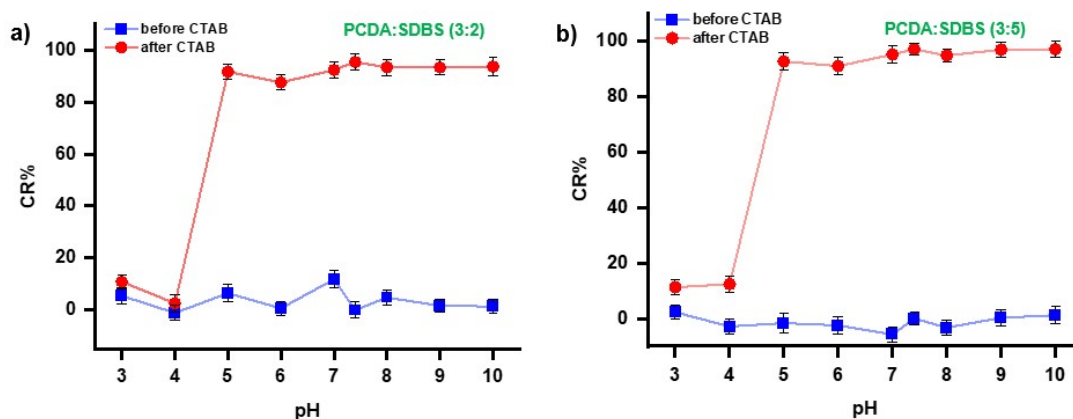

Figure S6. The colorimetric response of a) PCDA:SDBS (3:2), and b) PCDA:SDBS (3:2), (3:5) towards CTAB in varying pH.

4. Zeta potential studies

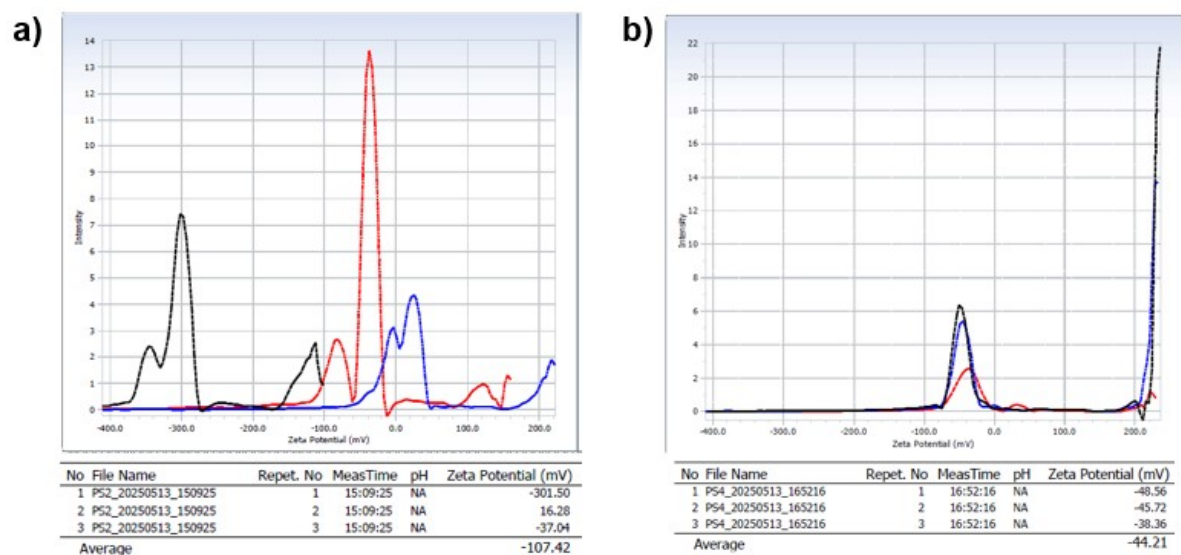

Figure S7. Zeta potential of a) PCDA:SDSBS and b) PCDA self-assembly displaying an increase in the negative nature of the self-assembly. This increased negative nature may possibly interfere with the H-abstraction process, leading to stability in basic pH.

5. Buffer study of PCDA:SDBS

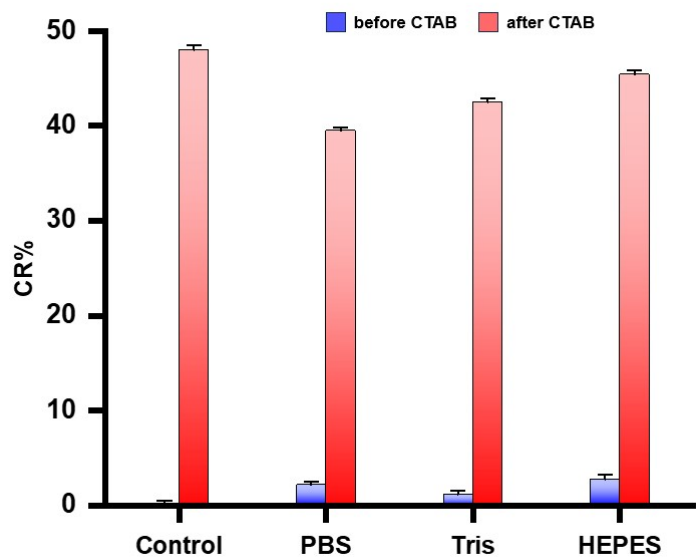

Figure S8. The colorimetric response of PCDA:SDBS in varying buffers at physiological pH. The results indicate the change in buffer system does not affect the polydiacetylene sensitivity.

## 6. Response of PCDA:SDBS towards common cations, anions and biogenic polyamines

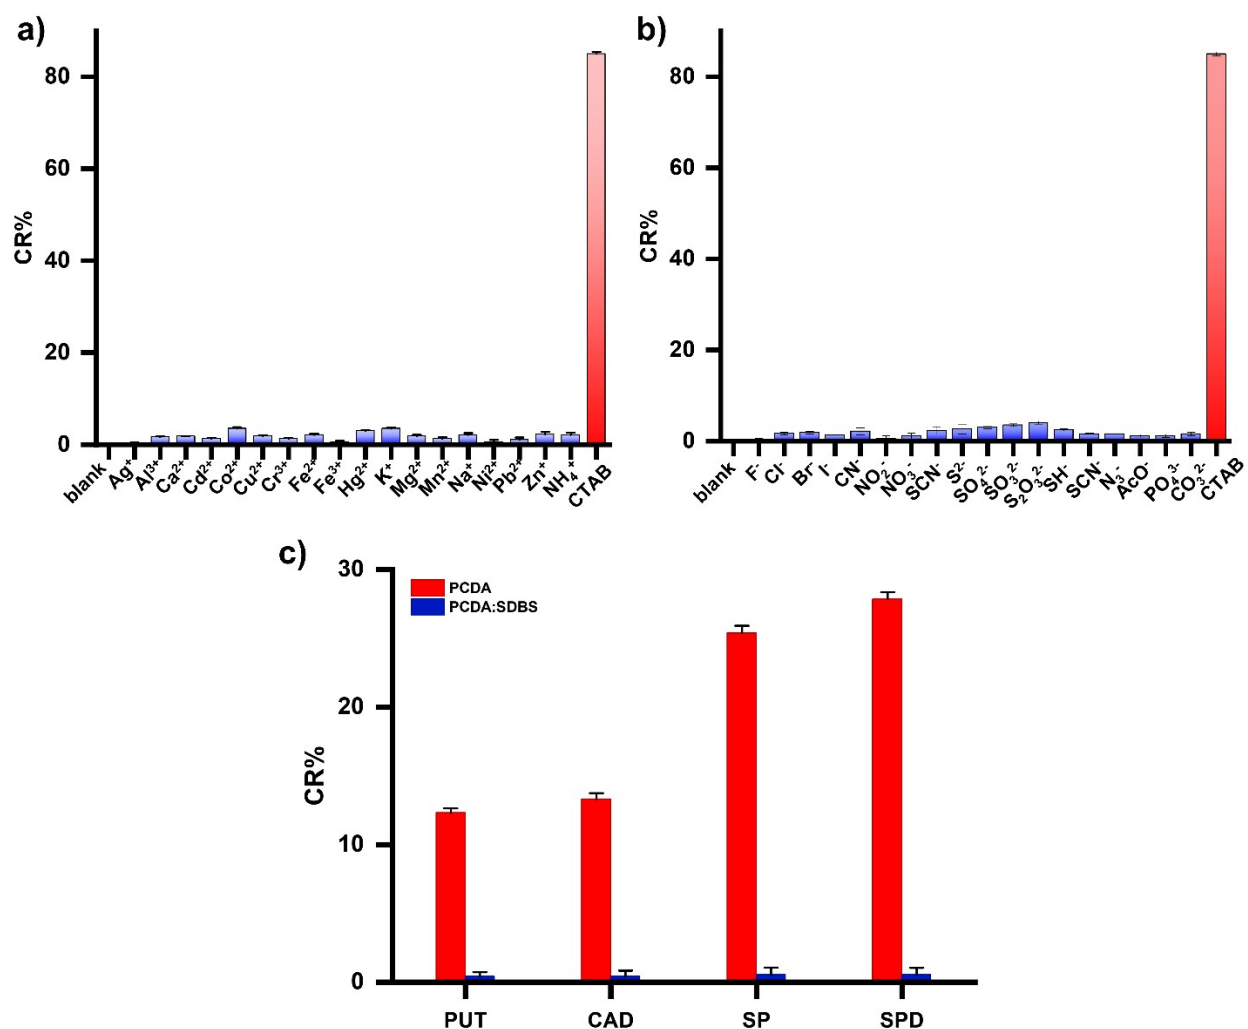

Figure S9. The colorimetric response of PCDA:SDBS towards common a) cations and b) anions, c) biogenic polyamines, indicating its stability in ionic environments and unresponsiveness to biogenic polyamine stimuli.

## 7. Thermal stability study

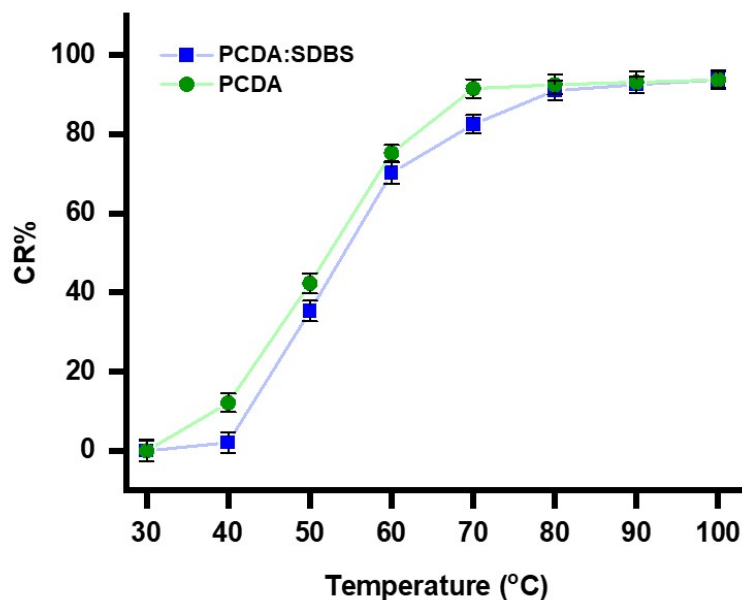

Figure S10. The thermal stability of PCDA:SDBS and PCDA displaying a typical blue-to-red change with more than 80% colorimetric response above 60 °C. PCDA:SDBS displays slightly better thermal stability than PCDA.

## 8. The response of PCDA:SDBS (3:5) upon the addition of CTAB

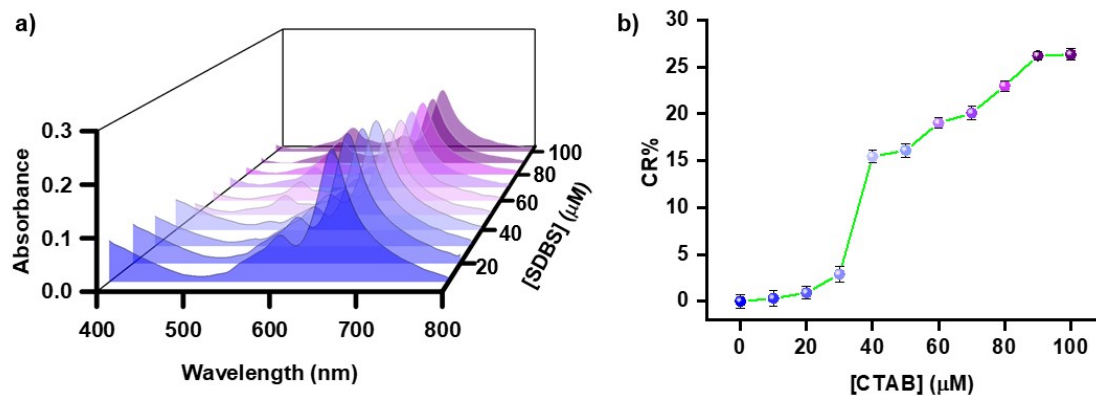

Figure S11. The change in (a) absorption band and (b) colorimetric response of varying ratios of PCDA:SDBS (3:5) upon the addition of CTAB. The 3:5 formulation with higher surfactant concentration loses one-third of its sensitivity, with the CR% lowering to 30%.



## 9. The UV-Vis response of PCDA:surfactant solution towards CTAB

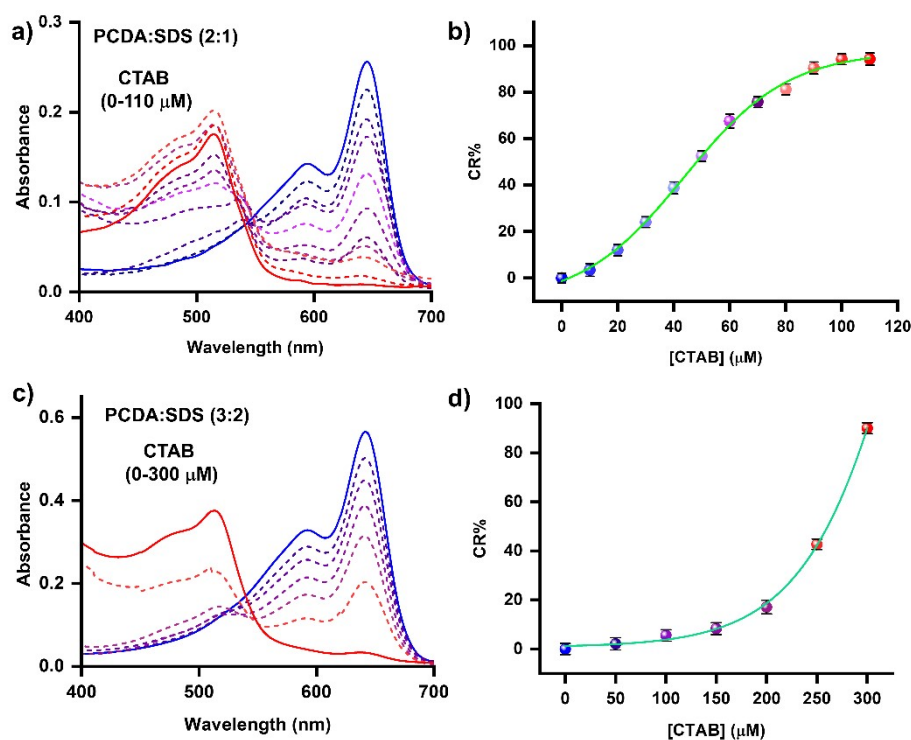

Figure S12. The change in (a), (c) absorbance and (b), (d) colorimetric response of PCDA:SDS (2:1 and 3:2, respectively) upon the addition of CTAB. An increase in the surfactant concentration leads to a decrease in the sensitivity of polydiacetylene.

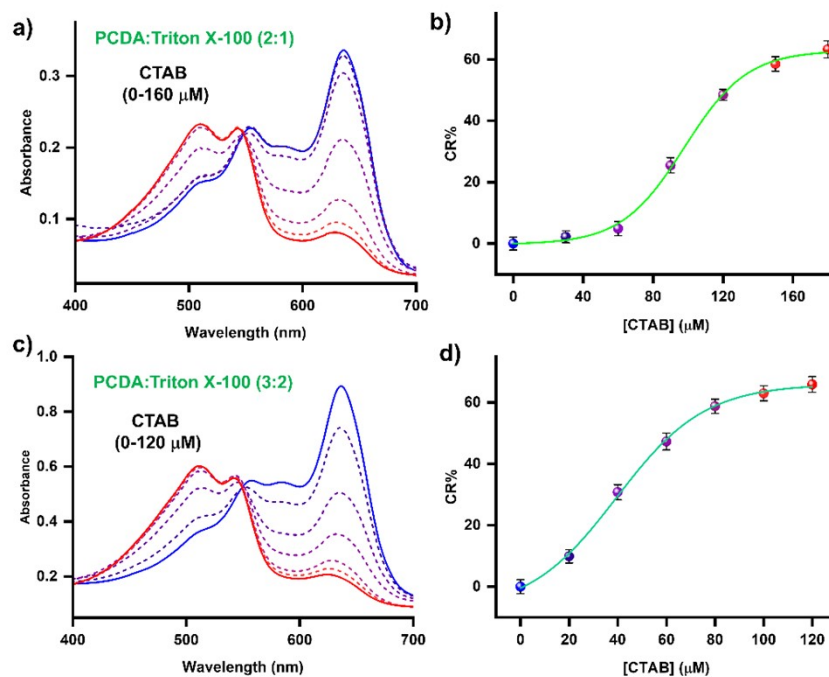

Figure S13. The change in (a), (c) absorbance and (b), (d) colorimetric response of PCDA:Triton X-100 (2:1 and 3:2, respectively) upon the addition of CTAB. Similar to that of the SDS, the increase in surfactant concentration leads to a decrease in the sensitivity of polydiacetylene.



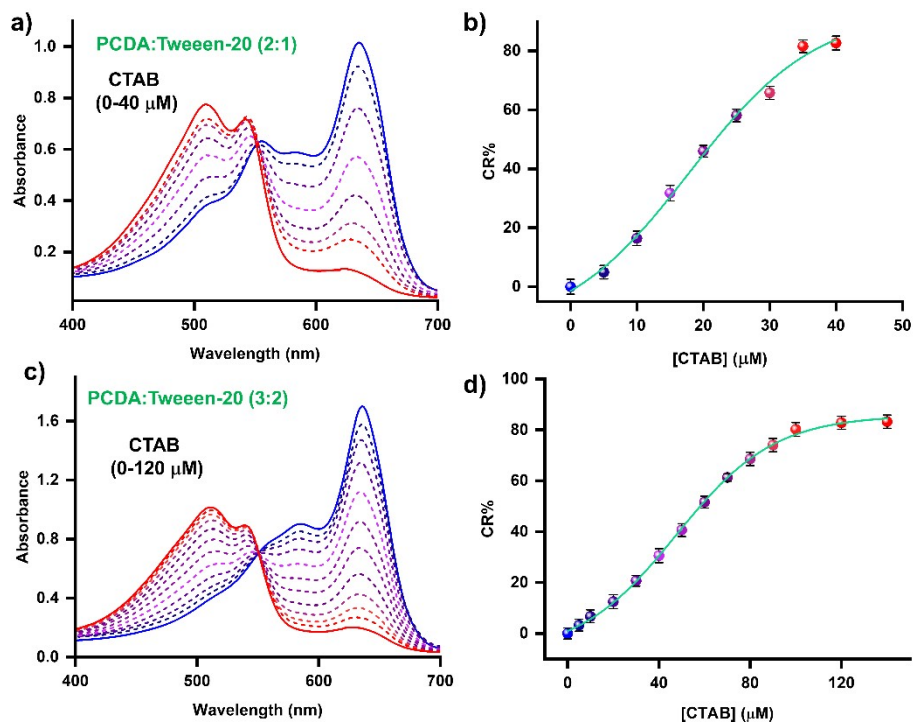

Figure S14. The change in (a), (c) absorbance and (b), (d) colorimetric response of PCDA:Tween-20 (2:1 and 3:2, respectively) upon the addition of CTAB. Upon incorporation of Tween-20, the sensitivity of polydiacetylene increased considerably, with the colorimetric response reaching 80% with 40  $\mu\text{M}$  CTAB addition.
